# Supplementary material
Source: publisher site journal article supplement (https://www.dovepress.com/article/443168)
Supplement: Supplementary file 1 [file get_supplementary_file.php]

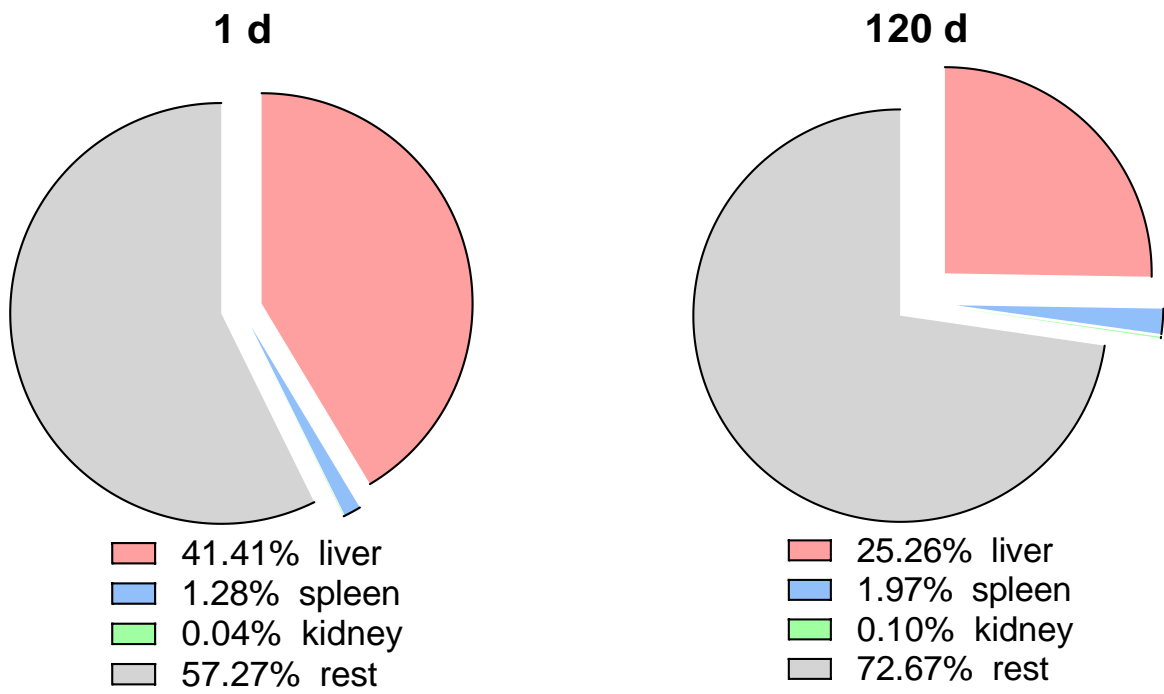

**Figure S1:** Change in the distribution of accumulated BSA-AuNPs in the three organs (liver, spleen, and kidneys) after 1 and 120 days.

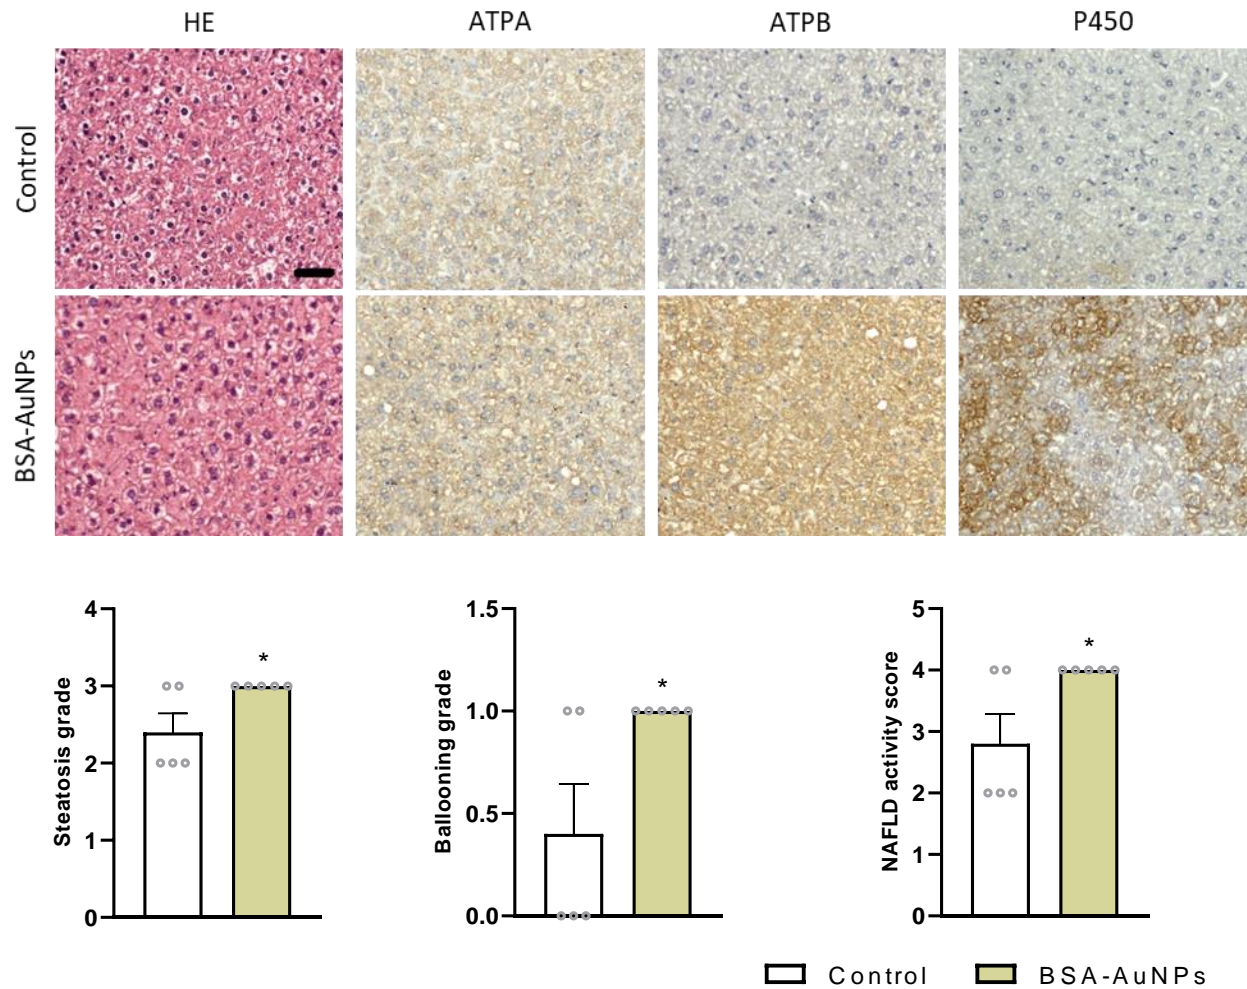

**Figure S2:** NAFLD (Non-Alcoholic Fatty Liver Disease) scoring analysis showed worsened parameters of NASH in livers of mice treated with BSA-AuNPs compared to controls after 120 days. Magnification 200x, bar 50  $\mu$ m. Statistical significance among groups:  $P < 0.05$  (\*)

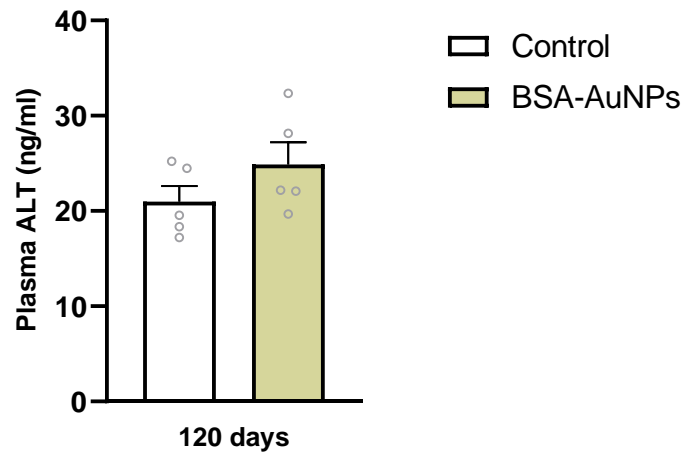

**Figure S3:** The changes in liver in treated mice have not affected the liver function, as evident from the plasma ALT levels.

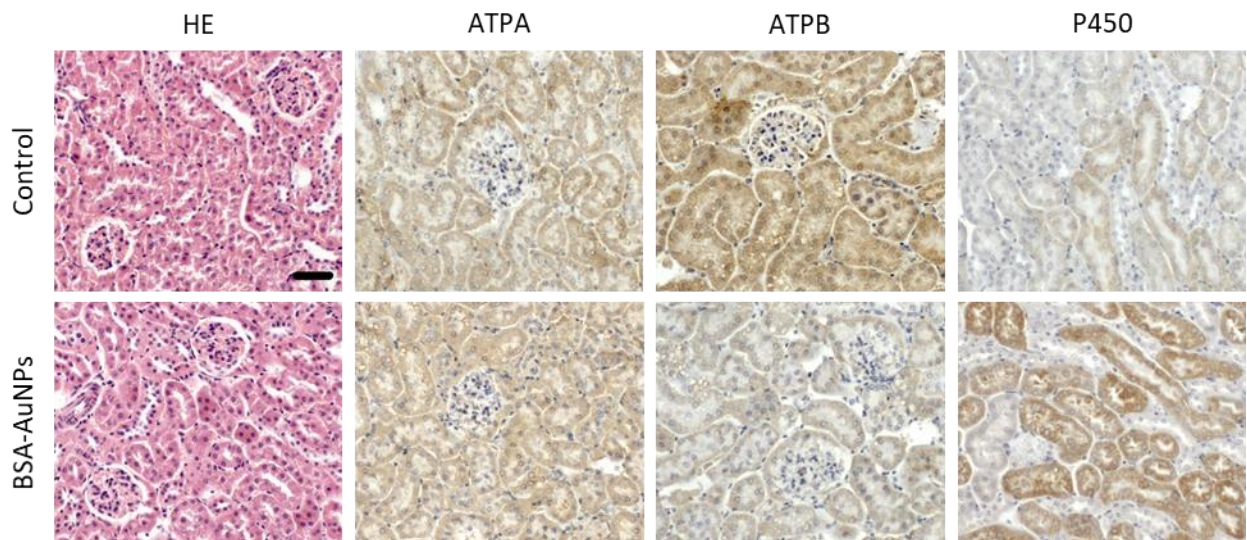

**Figure S4:** Characterization of the renal tissue using histochemical and immunohistochemical analyses revealed a certain tubular damage as a consequence of the long-term accumulation of BSA-AuNPs in mouse organism. Magnification 200x, bar 50  $\mu$ m.
